# Erratum: Delayed Response to U-500 Regular Insulin. Clinical Diabetes 2018;36:77–79 (DOI: 10.2337/cd16-0058)

Mayer B. Davidson

<https://doi.org/10.2337/cd18-er01>

The U-500 insulin algorithm depicted in Figure 1 of the article cited above (p. 78) contained two incorrect symbols in the follow-up section of the algorithm ( $\leq 130$ – $200$  mg/dL was shown instead of the correct  $>130$ – $200$  mg/dL and  $\leq 200$  mg/dL was shown instead of the correct  $>200$  mg/dL). The correct figure is shown below.

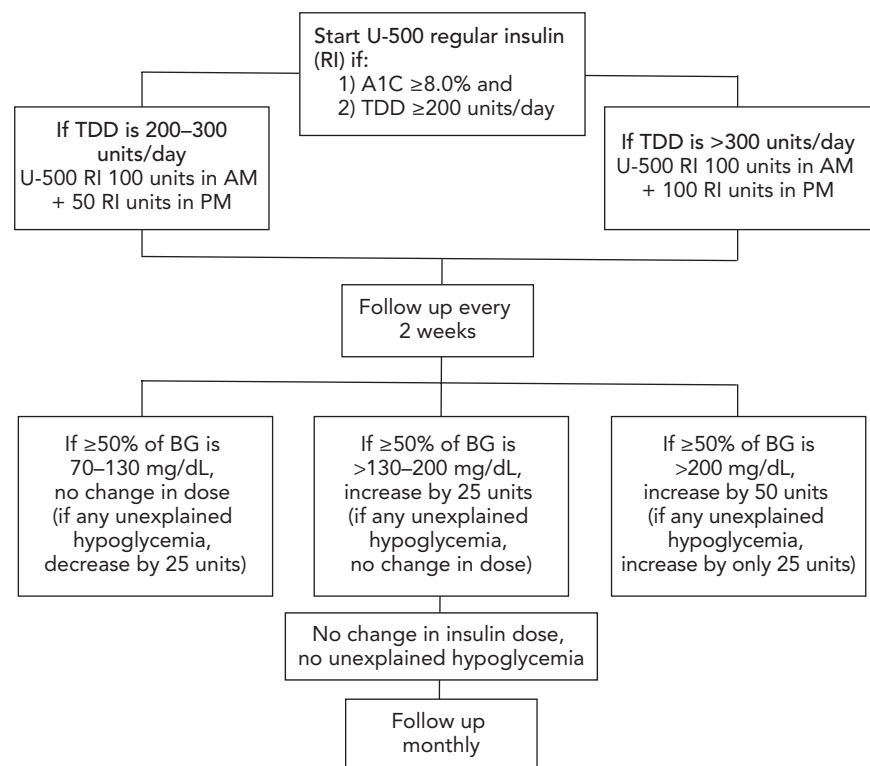

The online version of this article was updated on 3 April 2018 to reflect this change.
